# Supplementary material for: Knowledge, Beliefs and&nbsp;Attitudes Towards Dementia and Dementia Risk Reduction Among Descendants of People with Dementia: A&nbsp;Qualitative Study Using Focus Group Discussions
Source: Research Square preprint supplement (doi:10.21203/rs.3.rs-283961/v1), 2021-03-02
Supplement: Supplementary file 1 [file 1106138dd92897b06d8f7cb0.docx]

Consolidated criteria for reporting qualitative studies (COREQ): 32-item checklist

| No Item | Guide questions / description | Location |
| --- | --- | --- |
| **Domain 1: Research team and reflexivity** |  |  |
| Personal Characteristics |  |  |
| 1. Interviewer/facilitator | Which author/s conducted the interview or focus group? | Methods, paragraph 2 (page 6) |
| 2. Credentials | What were the researcher’s credentials? E.g. PhD, MD | Title page (page 1) |
| 3. Occupation | What was their occupation at the time of the study? | Methods, paragraph 2 (page 6) |
| 4. Gender | Was the researcher male or female? | Methods, paragraph 2 (page 6) |
| 5. Experience and training | What experience or training did the researcher have? | Methods, paragraph 2 (page 6) |
| Relationship with participants |  |  |
| 6. Relationship established | Was a relationship established prior to study commencement? | Methods, paragraph 1 (page 5) |
| 7. Participant knowledge of the interviewer | What did the participants know about the researcher? e.g. personal goals, reasons for doing the research | Methods, paragraph 1 (page 5) |
| 8. Interviewer characteristics | What characteristics were reported about the interviewer/facilitator? e.g. Bias, assumptions, reasons and interests in the research topic | Methods, paragraph 2 (page 6) |
| **Domain 2: study design** |  |  |
| Theoretical framework |  |  |
| 9. Methodological orientation and Theory | What methodological orientation was stated to underpin the study? e.g. grounded theory, discourse analysis, ethnography, phenomenology, content analysis | Methods, paragraph 2 (page 6) |
| Participant selection |  |  |
| 10. Sampling | How were participants selected? e.g. purposive, convenience, consecutive, snowball | Methods, paragraph 1 (page 5) |
| 11. Method of approach | How were participants approached? e.g. face-to-face, telephone, mail, email | Methods, paragraph 1 (page 5) |
| 12. Sample size | How many participants were in the study? | Results, paragraph 1 (page 7) |
| 13. Non-participation | How many people refused to participate or dropped out? Reasons? | N/A |
| Setting |  |  |
| 14. Setting of data collection | Where was the data collected? e.g. home, clinic, workplace | Methods, paragraph 2 (page 6) |
| 15. Presence of non-participants | Was anyone else present besides the participants and researchers? | N/A |
| 16. Description of sample | What are the important characteristics of the sample? e.g. demographic data, date | Results, paragraph 1 (page 7) |
| Data collection |  |  |
| 17. Interview guide | Were questions, prompts, guides provided by the authors? Was it pilot tested? | Methods, paragraph 2 (page 6) |
| 18. Repeat interviews | Were repeat interviews carried out? If yes, how many? | Results, paragraph 1 (page 7) |
| 19. Audio/visual recording | Did the research use audio or visual recording to collect the data? | Methods, paragraph 3 (page 6) |
| 20. Field notes | Were field notes made during and/or after the interview or focus group? | Methods, paragraph 2 (page 6) |
| 21. Duration | What was the duration of the interviews or focus group? | Methods, paragraph 2 (page 6) |
| 22. Data saturation | Was data saturation discussed? | N/A, goal was to explore relevant issues regarding dementia risk reduction for the study population |
| 23. Transcripts returned | Were transcripts returned to participants for comment and/or correction? | N/A |
| **Domain 3: analysis and findings** |  |  |
| Data analysis |  |  |
| 24. Number of data coders | How many data coders coded the data? | Methods, paragraph 3 (page 6) |
| 25. Description of the coding tree | Did authors provide a description of the coding tree? | Results, paragraph 1 (page 7/8) |
| 26. Derivation of themes | Were themes identified in advance or derived from the data? | Results, paragraph 1 (page 7/8) |
| 27. Software | What software, if applicable, was used to manage the data? | Methods, paragraph 3 (page 6) |
| 28. Participant checking | Did participants provide feedback on the findings? | N/A |
| Reporting |  |  |
| 29. Quotations presented | Were participant quotations presented to illustrate the themes / findings? Was each  quotation identified? e.g. participant number | Results (page 8-12) |
| 30. Data and findings consistent | Was there consistency between the data presented and the findings? | Results (page 8-12) |
| 31. Clarity of major themes | Were major themes clearly presented in the findings? | Results (page 8-12) |
| 32. Clarity of minor themes | Is there a description of diverse cases or discussion of minor themes? | N/A |
